# Supplementary material for: The Paradox Association between Smoking and Blood Pressure among Half Million Chinese People
Source: PubMed Central journal article supplement (PMC7215755; doi:10.3390/ijerph17082824), 2020-04-20
Supplement: ijerph-17-02824-s001.pdf [file ijerph-17-02824-s001.pdf]

## Supplementary

**Table S1.** Characteristics of the study populations by alcohol consumption status.

|                          | Non-drinkers<br>( <i>n</i> = 212,444) | Ex-drinkers<br>( <i>n</i> = 14,510) | Occasional drinkers<br>( <i>n</i> = 164,947) | Regular drinkers<br>( <i>n</i> = 67,914) | <i>p</i> |
|--------------------------|---------------------------------------|-------------------------------------|----------------------------------------------|------------------------------------------|----------|
| Age (years)              | 51.63 ± 10.68                         | 54.88 ± 10.18                       | 49.15 ± 10.06                                | 50.52 ± 10.02                            | <0.001   |
| 30–49                    | 93,420 (43.97)                        | 4,392 (30.27)                       | 90,021 (54.58)                               | 33,143 (48.8)                            |          |
| 50–69                    | 105,463 (49.64)                       | 8,862 (61.08)                       | 68,419 (41.48)                               | 31,668 (46.63)                           |          |
| 70–79                    | 13,561 (6.38)                         | 1,256 (8.66)                        | 6,507 (3.94)                                 | 3,103 (4.57)                             |          |
| Sex                      |                                       |                                     |                                              |                                          | <0.001   |
| Male                     | 35,208 (16.57)                        | 12,346 (85.09)                      | 70,516 (42.75)                               | 62,166 (91.54)                           |          |
| Female                   | 177,236 (83.43)                       | 2,164 (14.91)                       | 94,431 (57.25)                               | 5,748 (8.46)                             |          |
| Education                |                                       |                                     |                                              |                                          | <0.001   |
| Illiterate               | 61,396 (28.9)                         | 1,635 (11.27)                       | 16,452 (9.97)                                | 5,789 (8.52)                             |          |
| Primary school           | 72,897 (34.31)                        | 5,994 (41.31)                       | 45,416 (27.53)                               | 21,514 (31.68)                           |          |
| Middle school            | 50,902 (23.96)                        | 4,060 (27.98)                       | 54,267 (32.9)                                | 22,877 (33.69)                           |          |
| High school              | 21,682 (10.21)                        | 1,985 (13.68)                       | 34,292 (20.79)                               | 12,383 (18.23)                           |          |
| College and above        | 5,567 (2.62)                          | 836 (5.76)                          | 14,520 (8.8)                                 | 5,351 (7.88)                             |          |
| Smoking                  |                                       |                                     |                                              |                                          | <0.001   |
| Non-smokers              | 181,790 (85.57)                       | 2,802 (19.31)                       | 100,743 (61.08)                              | 9,380 (13.81)                            |          |
| Ex-smokers               | 3,144 (1.48)                          | 1,755 (12.10)                       | 6,427 (3.90)                                 | 6,251 (9.20)                             |          |
| Occasional smokers       | 4,783 (2.25)                          | 1,460 (10.06)                       | 14,888 (9.03)                                | 5,944 (8.75)                             |          |
| Regular smokers          | 22,727 (10.70)                        | 8,493 (58.53)                       | 42,889 (26.00)                               | 46,339 (68.23)                           |          |
| MET-hours/day            | 21.63 ± 13.68                         | 19.68 ± 14.29                       | 21.37 ± 13.65                                | 23.19 ± 14.72                            | <0.001   |
| BMI (kg/m <sup>2</sup> ) | 23.46 ± 3.39                          | 23.69 ± 3.37                        | 23.77 ± 3.28                                 | 23.64 ± 3.19                             | <0.001   |
| BMI < 18.5               | 10,979 (5.17)                         | 661 (4.56)                          | 5,306 (3.22)                                 | 2,262 (3.33)                             |          |
| 18.5 ≤ BMI < 23.9        | 113,928 (53.63)                       | 7,251 (49.97)                       | 85,793 (52.01)                               | 35,985 (52.99)                           |          |
| 24.0 ≤ BMI < 27.9        | 66,626 (31.36)                        | 5,074 (34.97)                       | 56,186 (34.06)                               | 23,128 (34.05)                           |          |
| BMI ≥ 28.0               | 20,911 (9.84)                         | 1,524 (10.5)                        | 17,662 (10.71)                               | 6,539 (9.63)                             |          |
| Hypertension             | 75,502 (35.54)                        | 6,083 (41.92)                       | 45,146 (27.37)                               | 25,399 (37.40)                           | <0.001   |
| SBP (mm Hg)              | 132.99 ± 23.88                        | 136.46 ± 23.3                       | 128.58 ± 20.84                               | 134.19 ± 20.69                           |          |
| DBP (mm Hg)              | 78.4 ± 12.07                          | 80.7 ± 12.64                        | 77.33 ± 11.43                                | 81.27 ± 12.03                            |          |

Data are expressed as mean ± SD or *n* (proportion %). MET-hours/wk: metabolic equivalent hours per wk; BMI: body mass index; SBP: systolic blood pressure; DBP: diastolic blood pressure. *p* values were calculated using the one-way analysis of variance for continuous variables and chi-square test for categorical variables.

**Table S2.** Multivariable<sup>a</sup> linear regression coefficients (95% confidence interval) for systolic and diastolic blood pressure level according to baseline alcohol consumption status.

|                             | Men ( <i>n</i> = 180,236)  |                            | Women ( <i>n</i> = 279,579) |                            |
|-----------------------------|----------------------------|----------------------------|-----------------------------|----------------------------|
|                             | SBP                        | DBP                        | SBP                         | DBP                        |
| Non-drinking<br>(reference) | -                          | -                          | -                           | -                          |
| Ex-drinking                 | 0.88 *** (0.49 to 1.28)    | 0.98 *** (0.75 to 1.22)    | -0.86 (-1.73 to 0.01)       | 0.20 (-0.28 to 0.67)       |
| Occasional drinking         | -1.75 *** (-2.00 to -1.50) | -0.85 *** (-0.99 to -0.70) | -2.36 *** (-2.53 to -2.20)  | -1.12 *** (-1.21 to -1.03) |
| Regular drinking            | 1.57 *** (1.31 to 1.83)    | 2.08 *** (1.93 to 2.24)    | -2.61 *** (-3.61 to -2.07)  | -0.23 (-0.53 to 0.07)      |

<sup>a</sup> Adjusted for age, body mass index, physical activity, educational level, and smoking. SBP: systolic blood pressure; DBP: diastolic blood pressure. \**p* < 0.05; \*\**p* < 0.01; \*\*\**p* < 0.001

**Table S3.** Blood pressure levels according to smoking and alcohol consumption status in men.

|                          | <b>Non-Smoking</b> | <b>Ex-Smoking</b> | <b>Occasional Smoking</b> | <b>Regular Smoking</b> |
|--------------------------|--------------------|-------------------|---------------------------|------------------------|
| Systolic blood pressure  |                    |                   |                           |                        |
| Non-drinking             | 136.51 ± 22.89     | 138.75 ± 22.73    | 135.38 ± 22.49            | 132.59 ± 22.29         |
| Ex-drinking              | 139.78 ± 23.69     | 139.73 ± 22.46    | 136.32 ± 22.47            | 135.89 ± 23.06         |
| Occasional drinking      | 131.98 ± 19.80     | 134.82 ± 20.52    | 131.30 ± 19.23            | 129.33 ± 19.24         |
| Regular drinking         | 135.83 ± 20.50     | 138.30 ± 20.88    | 133.90 ± 19.74            | 134.19 ± 20.45         |
| Diastolic blood pressure |                    |                   |                           |                        |
| Non-drinking             | 80.09 ± 12.33      | 80.82 ± 12.29     | 79.70 ± 12.26             | 78.26 ± 12.15          |
| Ex-drinking              | 82.49 ± 12.66      | 82.74 ± 12.39     | 81.61 ± 12.85             | 80.40 ± 12.7           |
| Occasional drinking      | 79.24 ± 11.36      | 80.27 ± 11.59     | 78.85 ± 11.42             | 77.73 ± 11.38          |
| Regular drinking         | 82.39 ± 12.11      | 83.46 ± 11.91     | 81.75 ± 11.85             | 81.29 ± 12.02          |

Data are expressed as mean ± SD.

**Table S4.** Blood pressure levels according to smoking and alcohol consumption status in women.

|                          | <b>Non-Smoking</b> | <b>Ex-Smoking</b> | <b>Occasional Smoking</b> | <b>Regular Smoking</b> |
|--------------------------|--------------------|-------------------|---------------------------|------------------------|
| Systolic blood pressure  |                    |                   |                           |                        |
| Non-drinking             | 132.71 ± 24.11     | 138.99 ± 24.01    | 133.42 ± 24.38            | 132.14 ± 24.28         |
| Ex-drinking              | 134.80 ± 24.72     | 133.00 ± 21.38    | 132.92 ± 25.74            | 133.84 ± 24.24         |
| Occasional drinking      | 127.08 ± 21.64     | 133.00 ± 22.05    | 125.72 ± 20.87            | 127.86 ± 22.85         |
| Regular drinking         | 128.31 ± 22.10     | 133.20 ± 24.93    | 127.40 ± 21.28            | 129.84 ± 22.25         |
| Diastolic blood pressure |                    |                   |                           |                        |
| Non-drinking             | 78.31 ± 12.04      | 77.94 ± 12.08     | 77.56 ± 12.18             | 75.95 ± 11.52          |
| Ex-drinking              | 79.20 ± 12.03      | 75.91 ± 11.33     | 78.11 ± 12.94             | 77.98 ± 11.71          |
| Occasional drinking      | 76.56 ± 11.37      | 77.39 ± 11.27     | 76.19 ± 10.89             | 75.62 ± 11.67          |
| Regular drinking         | 77.45 ± 11.29      | 78.30 ± 12.58     | 76.77 ± 10.79             | 76.98 ± 11.77          |

Data are expressed as mean ± SD.
